# Supplementary material
Source: PubMed Central journal article supplement (PMC6604799)
Supplement: NIHMS1030788-supplement-Supplemental_Figures.pdf [file NIHMS1030788-supplement-Supplemental_Figures.pdf]

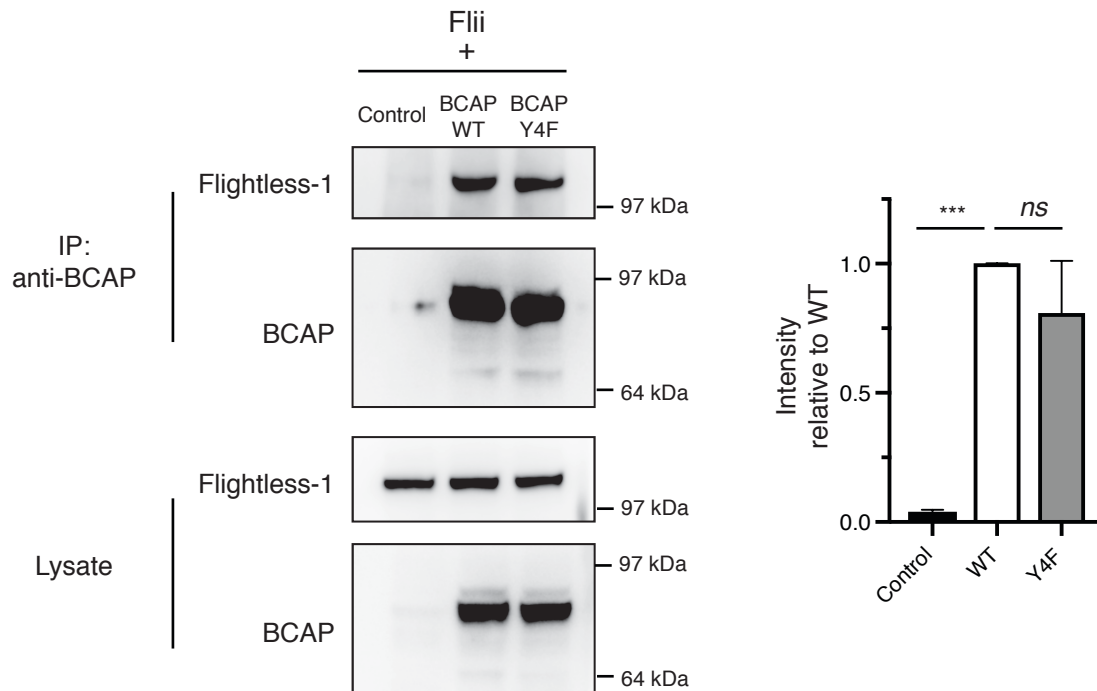

**Figure S1. BCAP YxxM tyrosines are not required for association with Flightless-1.** Western blot analysis of the indicated proteins in lysates from 293T cells co-transfected with plasmids encoding wild-type BCAP or Y4F BCAP mutant and Flightless-1 and then immunoprecipitated for BCAP. Blots (left) are representative of 3 independent experiments. Quantified band intensity values (right) of Flightless-1 in immunoprecipitates are means + SEM pooled from all experiments. *ns*, not significant; \*\*\* $P < 0.001$  by One way ANOVA with Tukey's post-test.

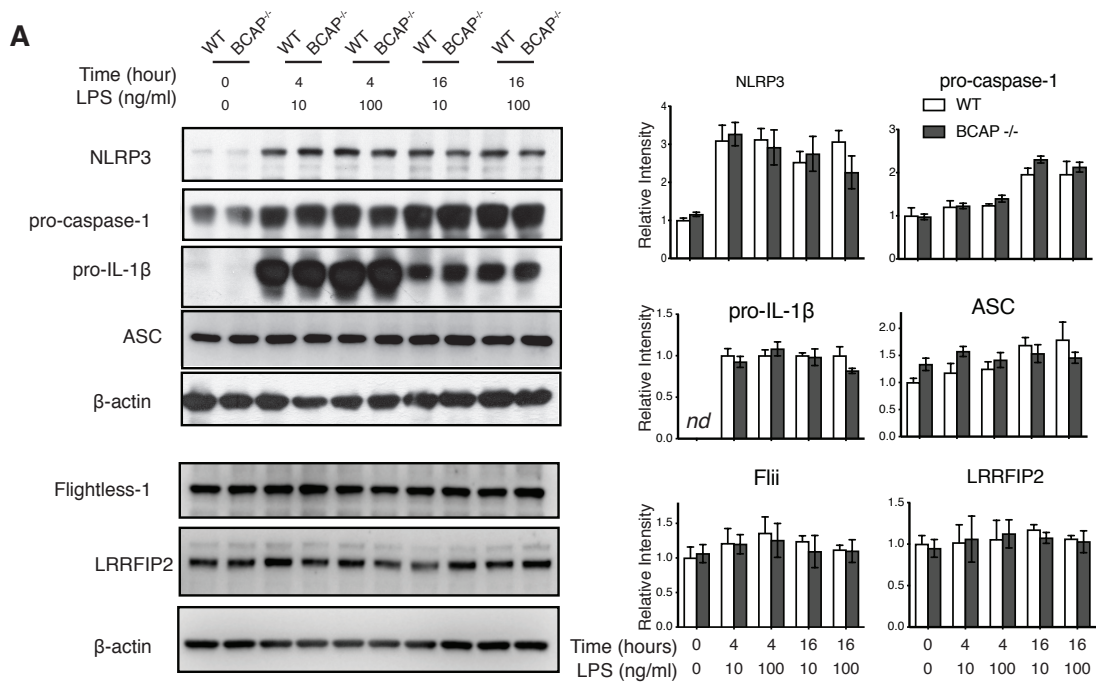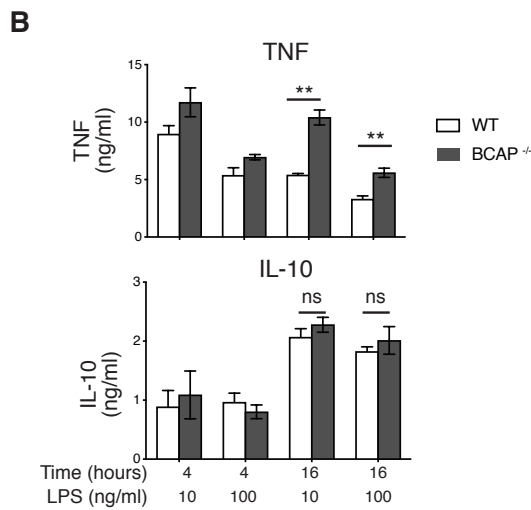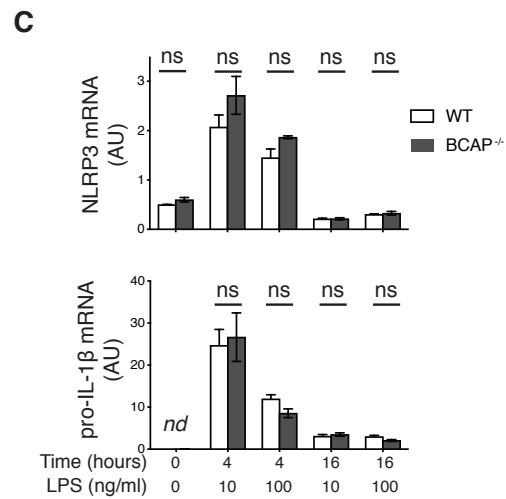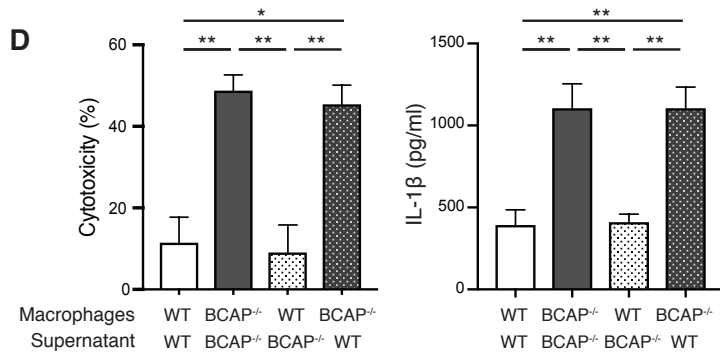

**Figure S2. No difference in expression of NLRP3 inflammasome components or soluble factors induced by LPS between WT and BCAP<sup>-/-</sup> macrophages.** (A) Western blot analysis for indicated proteins in WT and BCAP<sup>-/-</sup> BMDMs primed with 10 or 100 ng/ml of LPS for 4 or 16 h. Blots (left) are representative of and quantified band intensity values (right) are pooled from 3 experiments. Band intensities are normalized to untreated WT BMDMs (NLRP3, pro-caspase-1, ASC, Flightless-1, LRRFIP2) or WT BMDMs + 10 ng/ml LPS for 4 h (pro-IL-1 $\beta$ ). (B) ELISA analysis of TNF and IL-10 secretion by WT and BCAP<sup>-/-</sup> BMDMs in response to LPS stimulation. Data are means  $\pm$  SEM of 3 experiments performed in triplicate. (C) Quantitative RT-PCR analysis of mRNA encoding NLRP3 and pro-IL-1 $\beta$  in BMDMs before and after LPS priming. Data are means  $\pm$  SEM of 3 experiments performed in triplicate. (D) Cell death measured by LDH release and ELISA analysis of IL-1 $\beta$  secretion by BMDMs primed with LPS for 4 hours, and then cultured for an additional 2 hours in supernatants from either LPS-primed WT or BCAP<sup>-/-</sup> macrophages as indicated before treatment with nigericin for 30 min. Data are means + SEM of 2 independent experiments performed in triplicate. *nd*, not detected; *ns*, not significant; \**P*<0.05 and \*\**P*<0.01 by two-sided unpaired *t*-test.

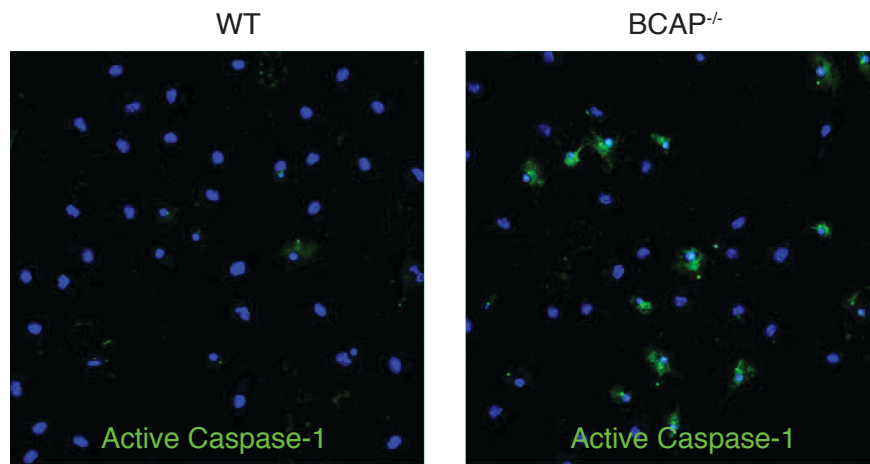

**Figure S3. BCAP<sup>-/-</sup> macrophages have increased caspase-1 activation after *YpstbΔ* infection.** Fluorescence analysis of BMDMs primed overnight with LPS (100 ng/ml) and then infected with a 10:1 MOI *YpstbΔ* for 2 hours. Cells were stained with the fluorescent active caspase-1 probe FAM-YVAD-FMK (green) and Hoescht 33342 (DNA, blue). Data are representative of 3 independent experiments, which are quantitated in Fig. 4A.

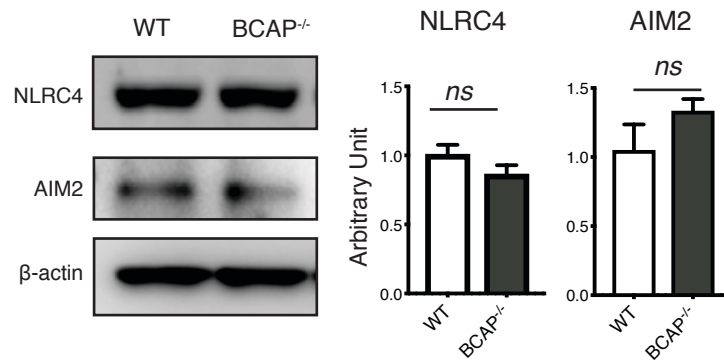

**Figure S4. No difference in NLRC4 or AIM2 expression between WT and BCAP<sup>-/-</sup> macrophages.** Western Blot analysis of NLRC4 and AIM2 in unprimed WT and BCAP<sup>-/-</sup> BMDMs. Blots (left) are representative of and quantified band intensity values are means  $\pm$  SEM pooled from 3 biological replicates. *ns*, not significant by two-sided unpaired *t*-test.

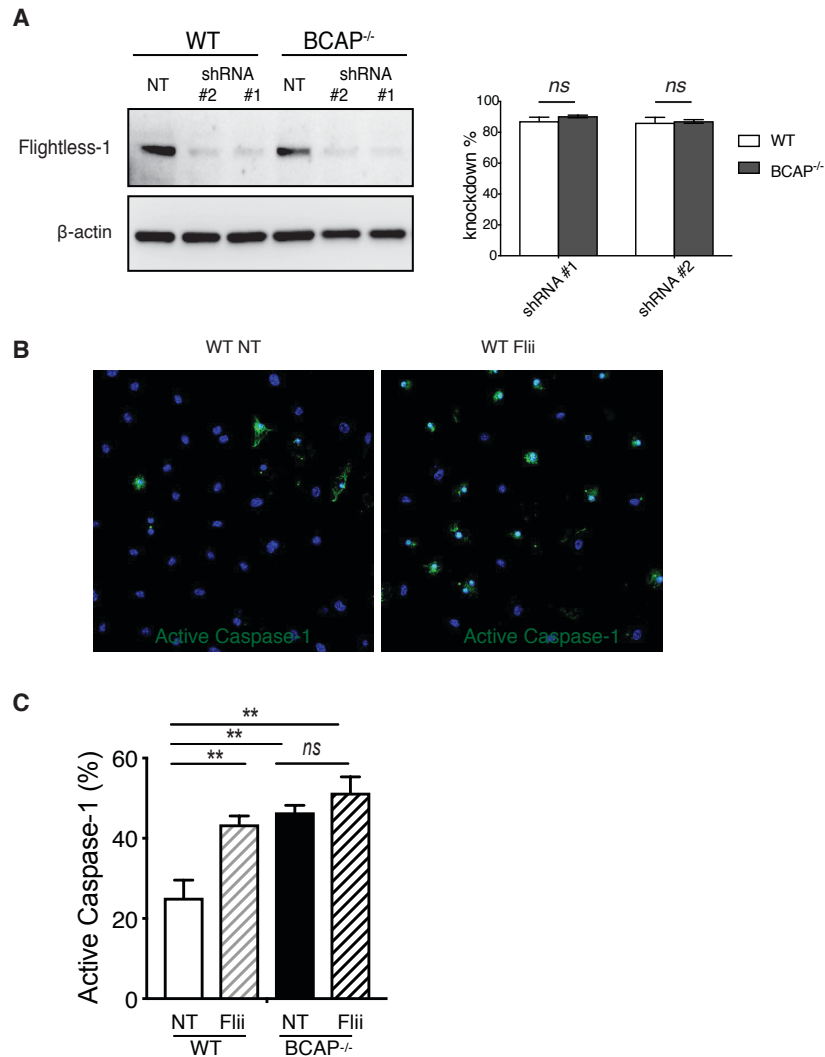

**Figure S5. BCAP inhibition of inflammasome activation requires Flightless-1.** (A) Western blot analysis of Flightless-1 knockdown in BMDMs infected with lentiviruses encoding for 2 different Flightless-1-targeting shRNAs. Blots (left) are representative of and quantified band intensity values (right) are means + SEM pooled from 3 independent experiments. (B) Immunofluorescence analysis of active caspase-1 (green) and DNA (blue) in BMDM transduced with non-targeting (NT) or Flii-specific shRNA#1 (Flii) and primed overnight with LPS, then infected with *Ypstd1* for 1 hour. Images are representative of 3 independent experiments, which are quantitated in Fig. 7C. (C) Immunofluorescence analysis for active caspase-1 in WT BMDM transduced with NT or Flii-specific shRNA #2 that were LPS-primed for 4hrs, then stimulated with nigericin. Data are means + SEM from 3 independent experiments. *ns*, not significant; and **\*\*** $P < 0.01$  by One way ANOVA with Tukey's post-test.

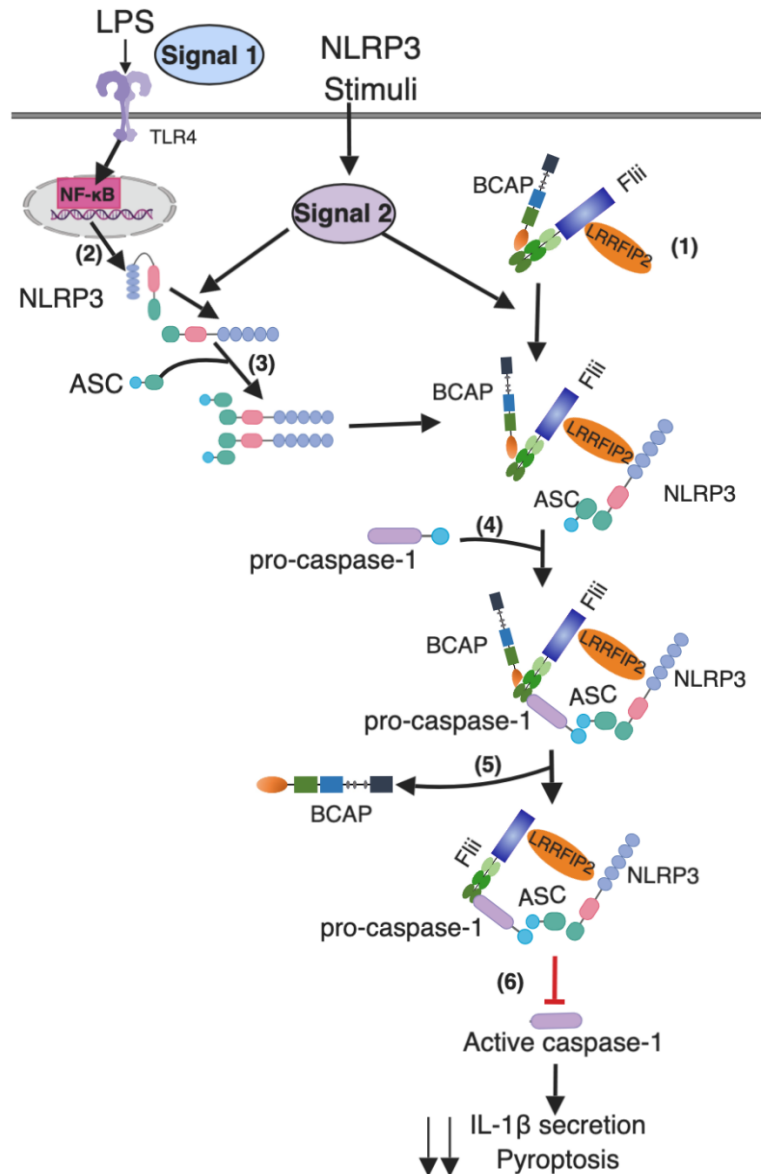

**Figure S6. Model of NLRP3 inflammasome inhibition by BCAP and Flightless-1.** (1) In resting BMDMs, BCAP is associated with the NLRP3 inflammasome regulators Flightless-1 and LRRFIP2. (2) During inflammasome priming (Signal 1), LPS signals through NF-κB and induces the transcription of NLRP3 and pro-IL-1β. (3) NLRP3 activation (Signal 2) causes the oligomerization of NLRP3 and subsequent ASC recruitment and oligomerization to the pre-inflammasome complex. (4) Upon signal 2, BCAP facilitates the association of the Flightless-1-LRRFIP2 complex with pro-caspase-1 and the NLRP3/ASC pre-inflammasome focus. (5) BCAP is then released from this complex. (6) The Flightless-1 mediated caspase-1 inhibition leads to reduced pyroptosis and IL-1β secretion. Figure was made with BioRender.
